# Supplementary material for: Evaluating Lean Thinking Implementation in a Jordanian Public Hospital: A Mixed- Methods Case Study
Source: Research Square preprint supplement (doi:10.21203/rs.3.rs-8063660/v1), 2025-12-17
Supplement: Supplementary file 1 [file 92e4459c9a82a8e6da18e547.docx]

**Main Questionnaire: Assessing Staff Perceptions of Lean Enablers and Overall Readiness**

1. **Demographic Data:**

Please tick as appropriate:

| Gender: | □ Male □ Female |
| --- | --- |
| Position within JUH: | □ Senior Manager  □ Manager  □ Supervisor  □ Frontline Staff  □ Clinical Staff |
| Current Department within JUH: | □ Quality Management office  □ Human Resources  □ Financial office  □ Information Technology  □Procurement and Supply  □Engineering, Maintenance, and Operations  □Patient Affairs Department (Clerks, Records, and Data Entry)  □Public Relations  □Medical education  □ Outpatient Clinics  □ Inpatient Department  □ Emergency Room  □ Operating Room  □ Pharmacy  □ ICU  □ Day case  □ Dialysis unit |
| Years of experience at JUH: | □ Less than 1  □ 1-2  □ 3-4  □ 5-6  □ 7 or more |
| Highest qualification: | □ Diploma or less  □ Bachelor’s  □ Master’s  □ PhD |

**For the following part (2-11) of the questionnaire please indicate how far you agree or disagree with each of the statements:**

**1 = strongly disagree, 2 = disagree, 3 = neutral, 4 = agree and 5 = strongly agree.**

**When answering, please tick as appropriate**

**(2) Leadership**

| **Item** | **Strongly Disagree** | **Disagree** | **Neutral** | **Agree** | **Strongly Agree** |
| --- | --- | --- | --- | --- | --- |
| 1. The overall mission and vision of JUH is clearly communicated to me. |  |  |  |  |  |
| 2. I understand my role in helping enable JUH to achieve its mission. |  |  |  |  |  |
| 3. My Department is given achievable and quantifiable goals which align with JUH’s mission and vision. |  |  |  |  |  |
| 4. I am aware of long term plans developed to support JUH’s mission and vision. |  |  |  |  |  |
| 5. My Manager is committed to realising and achieving JUH’s vision. |  |  |  |  |  |
| 6. Remuneration is commensurate and appropriate for the work I do. |  |  |  |  |  |
| 7. My salary and benefits encourage me and motivate me to work harder. |  |  |  |  |  |
| 8. Staff and team meetings take place at regular intervals. |  |  |  |  |  |
| 9. My manager ensures good on-the-job performance through regular support. |  |  |  |  |  |
| 10. My line manager continuously encourages me towards self-development and career progress. |  |  |  |  |  |
| 11. In general, relations between managers and staff are strong. |  |  |  |  |  |
| 12. My manager makes good decisions. |  |  |  |  |  |
| 13. My line manager takes my ideas and opinions into consideration. |  |  |  |  |  |
| 14. I can express myself without worrying about negative consequences. |  |  |  |  |  |
| 15. I believe I have a high level of job security. |  |  |  |  |  |
| 16. I do NOT feel I am valued in my job. |  |  |  |  |  |

**(3) Organisational Culture**

| **Item** | **Strongly Disagree** | **Disagree** | **Neutral** | **Agree** | **Strongly Agree** |
| --- | --- | --- | --- | --- | --- |
| 1. Employees regularly engage in teamwork. |  |  |  |  |  |
| 2. There is a general sense of strong affiliation to JUH. |  |  |  |  |  |
| 3. The working environment is friendly and has a team spirit. |  |  |  |  |  |
| 4. I am only aware of the things that are related to my work and I do not know what other things are happening elsewhere in the hospital. |  |  |  |  |  |
| 5. I am regularly informed of what is going on within JUH. |  |  |  |  |  |
| 6. Staff are eager and free to discuss new ideas with each other and within their teams. |  |  |  |  |  |
| 7. Work is carried out cooperatively across more than one Department. |  |  |  |  |  |

**(4) Communication**

| **Item** | **Strongly Disagree** | **Disagree** | **Neutral** | **Agree** | **Strongly Agree** |
| --- | --- | --- | --- | --- | --- |
| 1. I am regularly informed about changes impacting my work. |  |  |  |  |  |
| 2. I am timely updated of important changes due to take place. |  |  |  |  |  |
| 3. Management communicates clear goals for employees to be achieved. |  |  |  |  |  |
| 4. Supervisors from different sections communicate well and work collaboratively. |  |  |  |  |  |
| 5. I am aware of the connection between my work and JUH’s goals or vision. |  |  |  |  |  |

**(5) Empowerment**

| **Item** | **Strongly Disagree** | **Disagree** | **Neutral** | **Agree** | **Strongly Agree** |
| --- | --- | --- | --- | --- | --- |
| 1. Staff training and development is prioritised in terms of investment. |  |  |  |  |  |
| 2. Employees participate fully in solving issues and problems. |  |  |  |  |  |
| 3. Employees are involved in developing standard processes for completing tasks. |  |  |  |  |  |
| 4. Employees are involved in planning and making work-related decisions. |  |  |  |  |  |
| 5. Employees have opportunities to interact with external stakeholders. |  |  |  |  |  |
| 6. Employees can access information about outcomes and quality. |  |  |  |  |  |

**(6) Motivation and Appraisal**

| **Item** | **Strongly Disagree** | **Disagree** | **Neutral** | **Agree** | **Strongly Agree** |
| --- | --- | --- | --- | --- | --- |
| 1. The working environment is usually positive. |  |  |  |  |  |
| 2. The working environment helps to support the completion of necessary tasks. |  |  |  |  |  |
| 3. Time allowed for completing tasks is enough. |  |  |  |  |  |
| 4. Equipment and tools required to complete tasks are adequate and available. |  |  |  |  |  |
| 5. There is NO objective assessment of staff performance. |  |  |  |  |  |
| 6. Employees’ achievements are acknowledged and rewarded. |  |  |  |  |  |
| 7. Employees are recognised and rewarded for good suggestions. |  |  |  |  |  |
| 8. Employees are recognised for good performance. |  |  |  |  |  |
| 9. Employees are criticised for poor performance. |  |  |  |  |  |
| 10. My manager or supervisor makes me responsible for my own work. |  |  |  |  |  |
| 11. My manager or supervisor gives me enough feedback. |  |  |  |  |  |
| 12. I have clear guidance for every task I must complete. |  |  |  |  |  |
| 13. I know what I am expected to do for all aspects of my role. |  |  |  |  |  |

**(7) Training and Development**

| **Item** | **Strongly Disagree** | **Disagree** | **Neutral** | **Agree** | **Strongly Agree** |
| --- | --- | --- | --- | --- | --- |
| 1. I receive the necessary training for fulfilling my role in the organisation. |  |  |  |  |  |
| 2. I know about existing training and development courses. |  |  |  |  |  |
| 3. Staff training programs are designed and renewed according to the criteria specified in each department. |  |  |  |  |  |
| 4. I have opportunities to develop my skills outside of the scope of my current position. |  |  |  |  |  |
| 5. My training meets the needs of my current job. |  |  |  |  |  |
| 6. My training prepares me to take on more responsibility in the future. |  |  |  |  |  |

**(8) Immediate Work Environment**

| **Item** | **Strongly Disagree** | **Disagree** | **Neutral** | **Agree** | **Strongly Agree** |
| --- | --- | --- | --- | --- | --- |
| 1. The working environment within my department allows me to achieve good performance. |  |  |  |  |  |
| 2. My team is concerned with addressing issues rather than assigning blame. |  |  |  |  |  |
| 3. Employees within my department seek means of changing processes in order to improve performance. |  |  |  |  |  |
| 4. Morale within my Department is high in general. |  |  |  |  |  |
| 5. I believe that the number of employees at my Department is proportional to the workload. |  |  |  |  |  |

**(9) Work Processes**

| **Item** | **Strongly Disagree** | **Disagree** | **Neutral** | **Agree** | **Strongly Agree** |
| --- | --- | --- | --- | --- | --- |
| 1. There is a designated name for each Process within my department. |  |  |  |  |  |
| 2. There is a designated person within my department responsible for providing training on each process to ensure that performance is in line with standards. |  |  |  |  |  |
| 3. Each process in my department has well-defined beginning and end points. |  |  |  |  |  |
| 4. Every employee involved in any process understands its nature and the expected outcomes. |  |  |  |  |  |
| 5. Each process in my department has a well-defined length of time to carry out the process steps. |  |  |  |  |  |
| 6. Processes in my department are often interrupted because of employees being unavailable. |  |  |  |  |  |
| 7. The competency levels of my colleagues are sufficient to ensure achievement of expected outcomes. |  |  |  |  |  |
| 8. Standards for carrying out tasks and completing processes in my department are accessible in a simple format, such as through an image, illustrating the expected conditions for tasks. |  |  |  |  |  |
| 9. Processes in my department are sometimes subject to delay because of clear guidelines being unavailable. |  |  |  |  |  |
| 10. Each process in my department has well-defined steps which are necessary to facilitate the required outcomes. |  |  |  |  |  |
| 11. Processes in my department are sometimes subject to delay because of disorganisation. |  |  |  |  |  |

**(10) Job Satisfaction**

| **Item** | **Strongly Disagree** | **Disagree** | **Neutral** | **Agree** | **Strongly Agree** |
| --- | --- | --- | --- | --- | --- |
| 1. All over, I am satisfied at JUH. |  |  |  |  |  |
| 2. I love the work I do. |  |  |  |  |  |
| 3. I think JUH can be developed to be a better organisation. |  |  |  |  |  |
| 4. I find my work engaging, challenging and interesting. |  |  |  |  |  |
| 5. There are many opportunities within JUH for career development. |  |  |  |  |  |
| 6. I am overworked and underpaid. |  |  |  |  |  |
| 7. The opportunity for promotion is available in accordance with the development of my knowledge and skills to take on more responsibilities. |  |  |  |  |  |

**(11) Personal assessment**

| **Item** | **Strongly Disagree** | **Disagree** | **Neutral** | **Agree** | **Strongly Agree** |
| --- | --- | --- | --- | --- | --- |
| 1. I am fully aware of some of the management development systems such as Lean system or another system similar to it. |  |  |  |  |  |
| 2. I am never late for my work. |  |  |  |  |  |
| 3. I do not use nor agree to use a mobile phone at all times while working. |  |  |  |  |  |
| 4. I welcome any opportunity to train on the development of management systems. |  |  |  |  |  |
| 5. I have complete knowledge of all aspects related to my job. |  |  |  |  |  |

**Thank you.**
