# Supplementary material for: Evaluating Lean Thinking Implementation in a Jordanian Public Hospital: A Mixed- Methods Case Study
Source: Research Square preprint supplement (doi:10.21203/rs.3.rs-8063660/v1), 2025-12-17
Supplement: Supplementary file 2 [file b56ec987b5088f3d43967221.docx]

**Semi-Structured Interview Guide**

**(A)**

**Interview protocol**

**For the departments that do not apply Lean Thinking yet**

1. What do you know about Lean thinking?

2. What do you think the employees working under you know about Lean thinking?

3. Did your department want to apply Lean thinking?

4.What area or aspect of your department do you think should be prioritised regarding implementing Lean thinking? What area do you think is important to start with? / What area would benefit the most from Lean Thinking in your opinion?

***Challenges***

5. Are there any specific challenges you anticipate as you move forward with implementing Lean systems? / Start to implement thinking / systems?

6. In your estimation, how willing are the employees working under you to accept change?

***Benefits***

7. What benefits do you expect to be observed?

8. How sustainable do you think these benefits will be?

***Support and Enablers***

9. From your perspective, what are the effects of current legislation, and of government support?

10. What are the factors supporting change?

11. What relevant training or development is already in place?

12. Are you willing to allocate a certain portion of training and development to aid the hospital’s readiness to implement Lean thinking?

- If no, then ask: What is stopping you from doing this? What barriers are there?
- IF yes, then ask: Can you provide more details?

13. Are employees empowered to take action themselves when it is beneficial? Please give examples.

14. Please identify key performance indicators for your organisation/department.

***Communication***:

15. What is the communication tool between your department and the other ones, between the managers and the employees and between the employees in the same department?

16. And how do you evaluate its effectiveness from 1 to 5 is the best?

17. In case any change happens, when and how do you tell the employees, even if the change is not about their work?

18. What do you think about the employees’ knowledge of the skills and their career tasks?

***If you are knowledgeable about Enterprise Resource Planning (ERP) please answer part (19), if not, then skip to question (20)***

19. What are your views about the use of Enterprise Resource Planning (ERP) within JUH?

- How effective / useful do you think it has been?
- What advantages are you aware of that have resulted from introducing ERP?
- What challenges or barriers to its successful implementation are you aware of?
- What factors / circumstances have helped in its implementation?

20. Is there anything important we have overlooked? Is there anything else you would like to add to what you have said?

**Thanks for your time.**

**(B)**

**Interview protocol**

**for departments that already apply Lean Thinking**

1. What do you know about Lean thinking?

2. What do you think the employees working under you know about Lean thinking?

3. When did your department start to apply Lean thinking?

4. How have Lean ideas / systems / processes been implemented in the department?

5. What initiatives / Lean ideas have been implemented?

6. Based on your experience, what would you say are the strengths of this Lean idea / technique?

7. To what extent was it implemented as planned?

8. What area or aspect of your department prioritised implementing Lean thinking? What area do you think is important to start with?

***Challenges***

9. What are the challenges you have already encountered in implementing Lean processes?

10. Are there any specific challenges you anticipate as you move forward and implement further Lean systems?

11. In your estimation, how willing are the employees working under you to accept change?

***Benefits***

12. What benefits have you observed?

13. How sustainable do you think these benefits are?

***Support and Enablers***

14. From your perspective, what are the effects of current legislation, and of government support?

15. What are the factors supporting change?

16. What relevant training or development is already in place?

17. Are you willing to allocate a certain portion of training and development to aiding the hospital’s readiness to implement Lean thinking?

a. IF no, then ask: What is stopping you from doing this? What barriers are there?

b. IF yes, then ask: Can you provide more details?

18. Are employees empowered to take action themselves when it is beneficial? Please give examples.

19. Please identify key performance indicators for your organisation/department?

***Communication:***

20. What is the communication tool between your department and the other ones, between the managers and the employees and between the employees in the same department?

21. And how do you evaluate its effectiveness from 1 to 5 is the best?

22. In case any change happens, when and how do you tell the employees, even if the change is not about their work?

23. What do you think about the employees’ knowledge of the skills and their career tasks?

***If you are knowledgeable about Enterprise Resource Planning (ERP) please answer part (24), if not then skip to question (25)***

24. What are your views about the use of (ERP) within JUH?

- How effective / useful do you think it has been?
- What advantages are you aware of that have resulted from introducing ERP?
- What challenges or barriers to its successful implementation are you aware of?
- What factors / circumstances have helped in its implementation?

25. Is there anything important we have overlooked? Is there anything else you would like to add to what you’ve said?

**Thanks for your time.**
